# Supplementary material for: Increasing Patient Safety Event Reporting in an Emergency Medicine Residency
Source: PubMed Central journal article supplement — BMJ Qual Improv Rep. 2017 Apr 27;6(1):u223876.w5716. doi: 10.1136/bmjquality.u223876.w5716 (PMC5411728; doi:10.1136/bmjquality.u223876.w5716), 2017-04-27
Supplement: bmjqir.u223876.w5716supp_fig2.pdf [file bmjqir.u223876.w5716supp_fig2.pdf]

## Patient Safety Survey After Presentation

### Emergency Medicine Patient Safety Survey

**This survey asks questions about patient safety event reporting.**

**It should take you about 5 minutes to complete.**

**If you do not wish to answer a question, or if a question does not apply to you, you may leave your answer blank.**

1. What is your primary role?

- Attending EM Physician
- R1 in Emergency Medicine
- R2 in Emergency Medicine
- R3 in Emergency Medicine
- Other (please specify)

2. If you are an attending physician, how many years have you been in practice after residency?

- Less than 5 years
- 5-9 years
- 10-14 years
- 15-19 years
- 20 years or more

3. Gender

- Female
- Male

4. Please indicate if you agree or disagree with the following statements.

|                                                                                                     | Agree                 | Disagree              | Not sure              |
|-----------------------------------------------------------------------------------------------------|-----------------------|-----------------------|-----------------------|
| A patient safety event always involves patient harm                                                 | <input type="radio"/> | <input type="radio"/> | <input type="radio"/> |
| A patient safety event always involves an error                                                     | <input type="radio"/> | <input type="radio"/> | <input type="radio"/> |
| Healthcare workers should report NEAR MISSES to their hospital or healthcare organization           | <input type="radio"/> | <input type="radio"/> | <input type="radio"/> |
| Healthcare workers should report MINOR errors to their hospital or healthcare organization          | <input type="radio"/> | <input type="radio"/> | <input type="radio"/> |
| Healthcare workers should report SERIOUS errors to their hospital or healthcare organization        | <input type="radio"/> | <input type="radio"/> | <input type="radio"/> |
| Healthcare workers should report expected bad outcomes to their hospital or healthcare organization | <input type="radio"/> | <input type="radio"/> | <input type="radio"/> |
| As a healthcare provider, I will undoubtedly be responsible for a medical error at some time        | <input type="radio"/> | <input type="radio"/> | <input type="radio"/> |
| Patient safety events are very rare                                                                 | <input type="radio"/> | <input type="radio"/> | <input type="radio"/> |
| I am confident I know what patient safety events to report                                          | <input type="radio"/> | <input type="radio"/> | <input type="radio"/> |
| I know how to report a patient safety event at the institutions I work                              | <input type="radio"/> | <input type="radio"/> | <input type="radio"/> |
| I feel confident I know where to find Sensor                                                        | <input type="radio"/> | <input type="radio"/> | <input type="radio"/> |
| I feel confident I know how to enter a patient safety event into Sensor                             | <input type="radio"/> | <input type="radio"/> | <input type="radio"/> |

5. Any comments you would like to add?
